# Supplementary material for: Structural k -means (S k -means) and clustering uncertainty evaluation framework (CUEF) for mining climate data
Source: Copernicus journal article supplement (doi:10.5194/gmd-16-2215-2023), 2023-04-24
Supplement: Supplementary file 1 [file SupplementaryInfo_fin.pdf › Supmat/SupplementaryInfo_fin.pdf]

# Supplementary Material

---

This file includes figures, that provide the same information as those in the main text but for different runs (i.e., initializations).

## Results for the WP test

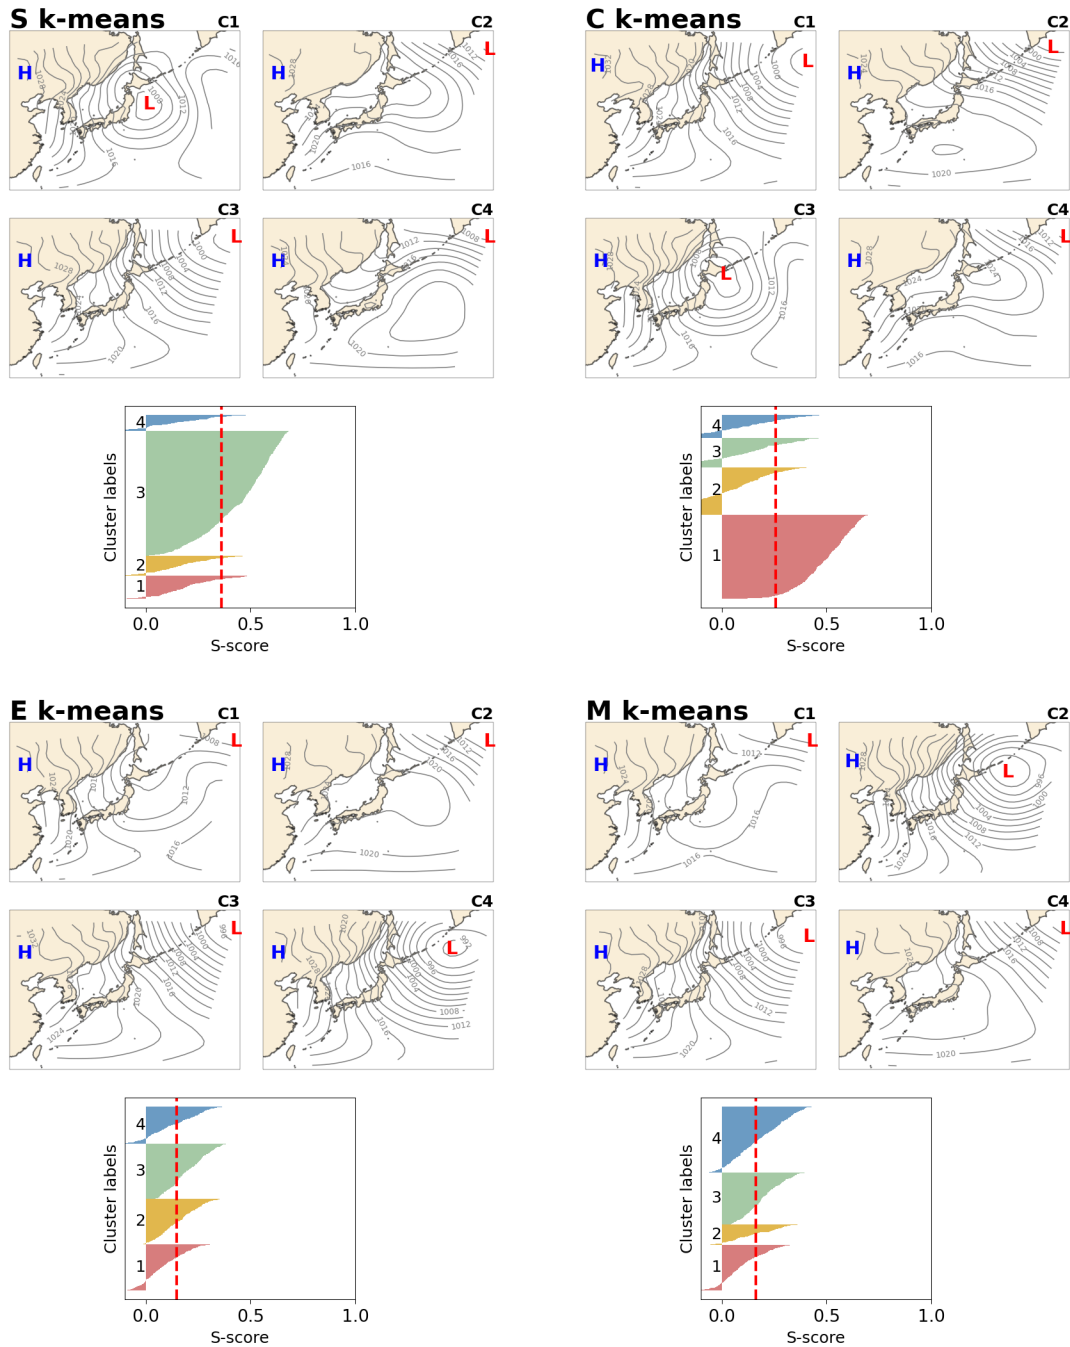

**Fig. S1** Similar with Figure 3 in the main manuscript but for the results from run 1. The winter SLP pattern revealed by S, C, E, and M k-means with  $k = 4$ . "H" indicates the location of the high and "L" indicates the location of the low. General silhouette analysis results are shown below the maps where x-axis indicate the score, and y-axis the label of cluster numbered 1 – 4. Input data are ERA-Interim SLP data, which were re-gridded to Cartesian coordinates with a resolution of  $200 \times 200$  km and grid size of  $35 \times 35$ . Daily data for December, January, and February over ten year 2005 – 2014 were used.

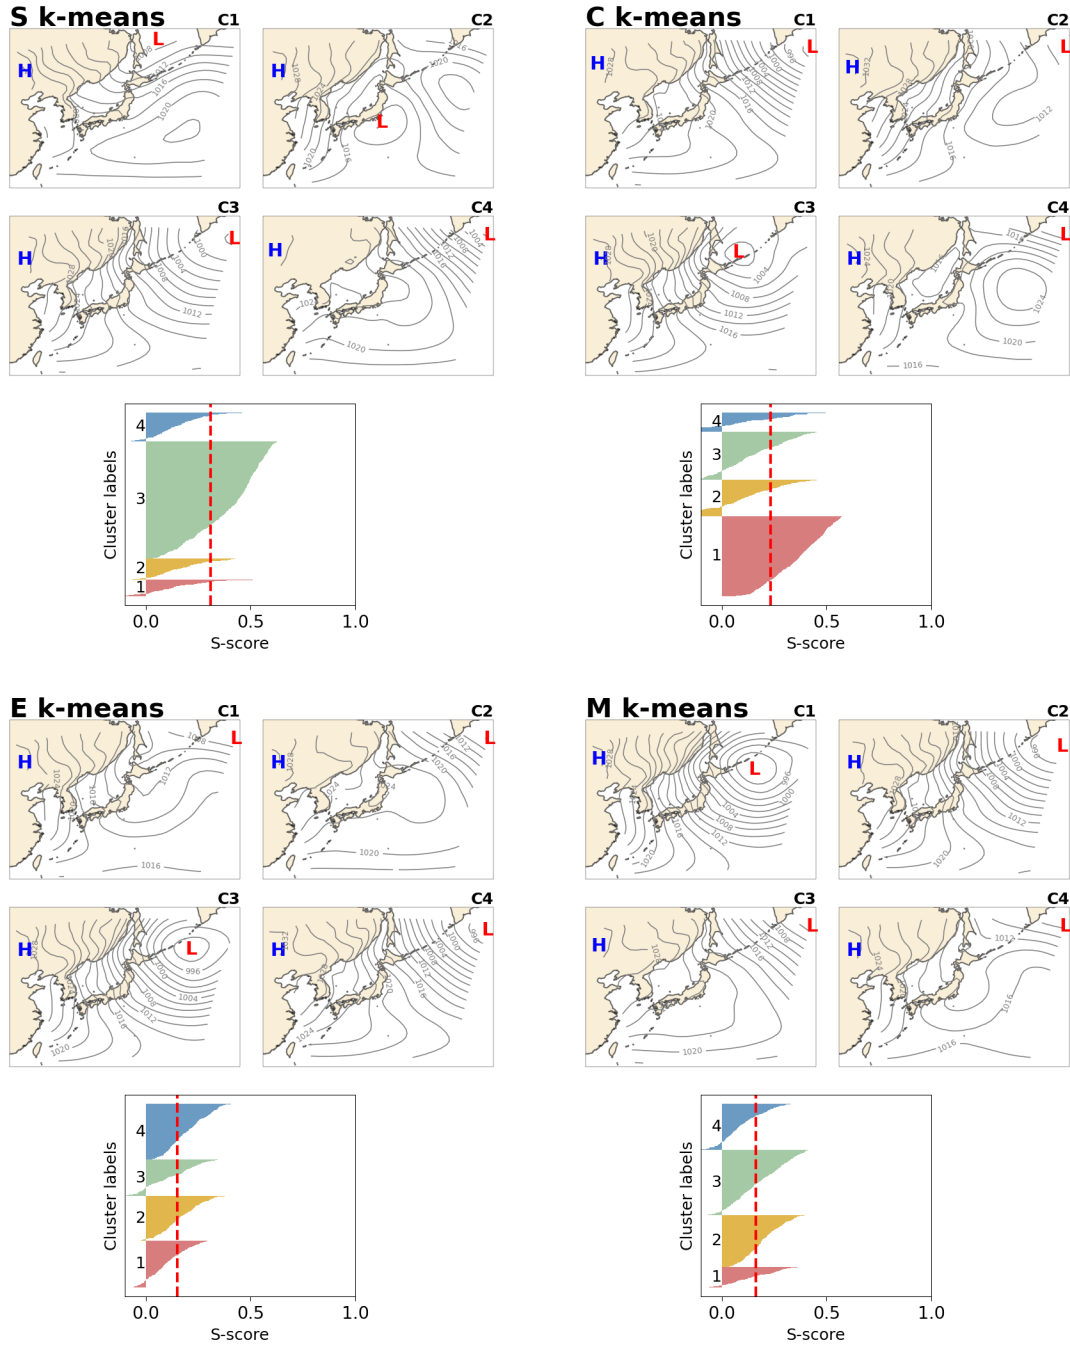

**Fig. S2** Similar with Figure 3 in the main manuscript but for the results from run 2. The winter SLP pattern revealed by S, C, E, and M k-means with  $k = 4$ . "H" indicates the location of the high and "L" indicates the location of the low. General silhouette analysis results are shown below the maps where x-axis indicate the score, and y-axis the label of cluster numbered 1 – 4. Input data are ERA-Interim SLP data, which were re-gridded to Cartesian coordinates with a resolution of  $200 \times 200$  km and grid size of  $35 \times 35$ . Daily data for December, January, and February over ten year 2005 – 2014 were used.

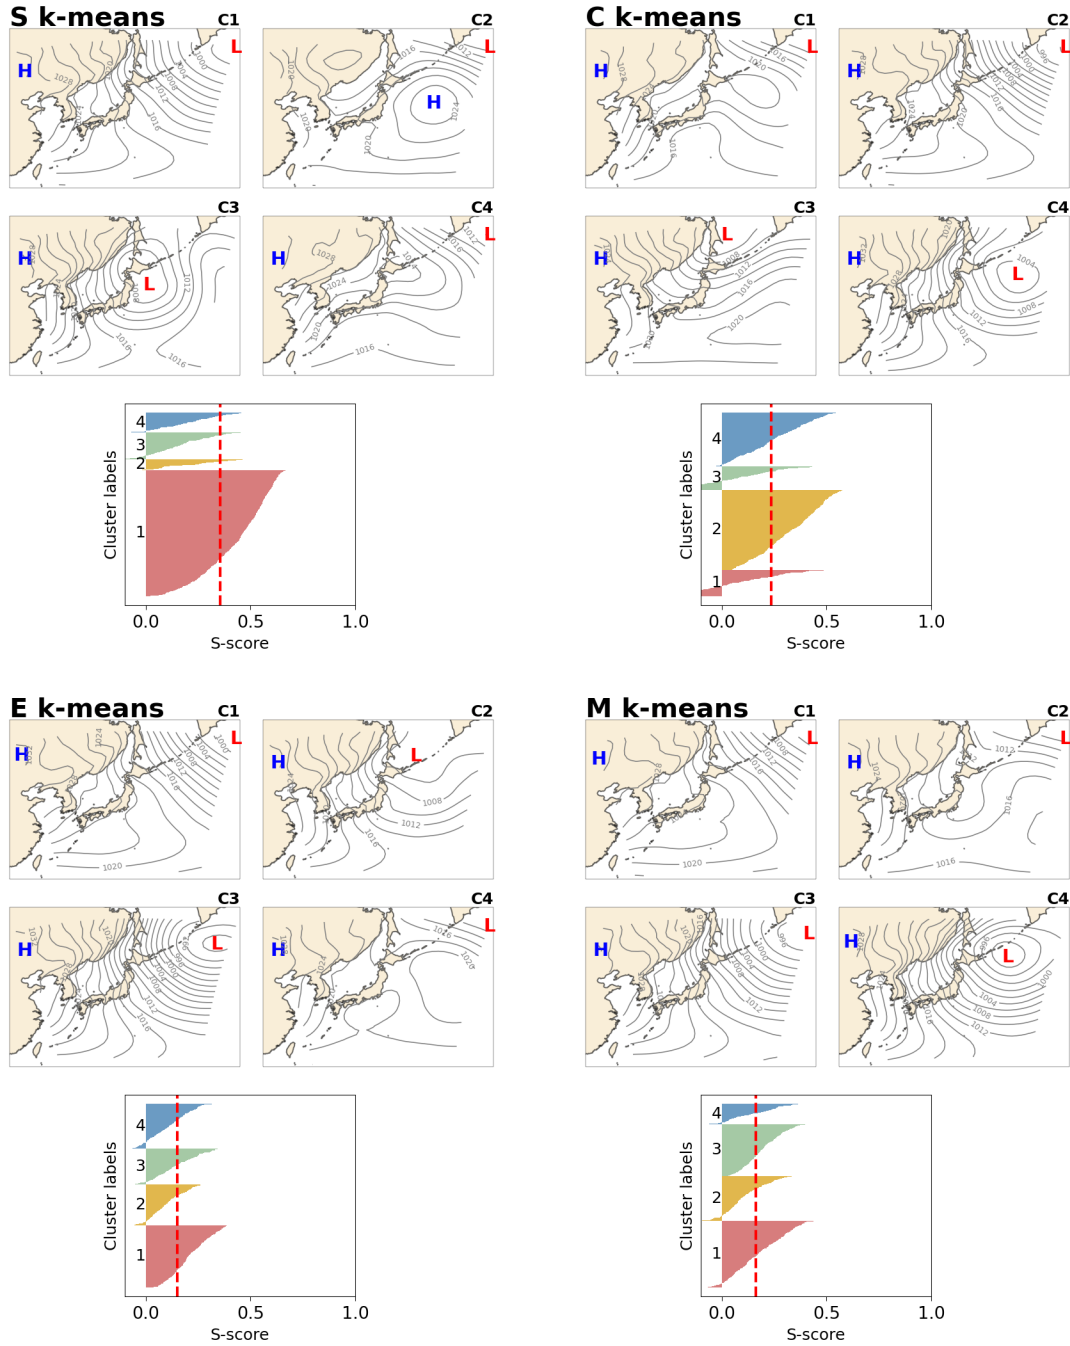

**Fig. S3** Similar with Figure 3 in the main manuscript but for the results from run 3. The winter SLP pattern revealed by S, C, E, and M k-means with  $k = 4$ . "H" indicates the location of the high and "L" indicates the location of the low. General silhouette analysis results are shown below the maps where x-axis indicate the score, and y-axis the label of cluster numbered 1 – 4. Input data are ERA-Interim SLP data, which were re-gridded to Cartesian coordinates with a resolution of  $200 \times 200$  km and grid size of  $35 \times 35$ . Daily data for December, January, and February over ten year 2005 – 2014 were used.



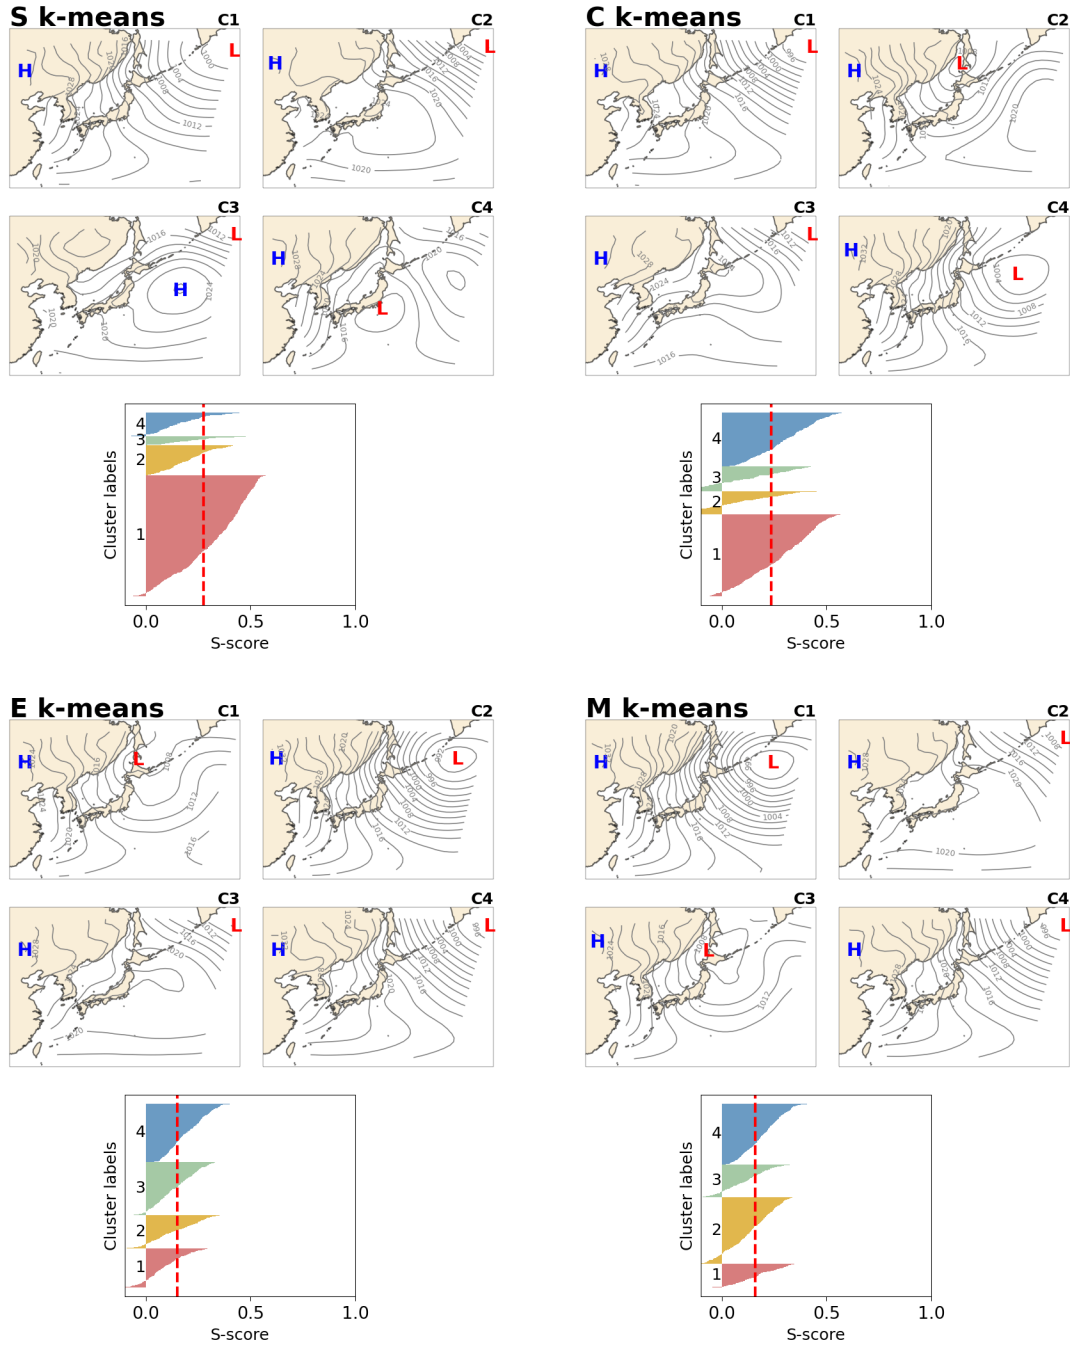

**Fig. S4** Similar with Figure 3 in the main manuscript but for the results from run 4. The winter SLP pattern revealed by S, C, E, and M k-means with  $k = 4$ . "H" indicates the location of the high and "L" indicates the location of the low. General silhouette analysis results are shown below the maps where x-axis indicate the score, and y-axis the label of cluster numbered 1 – 4. Input data are ERA-Interim SLP data, which were re-gridded to Cartesian coordinates with a resolution of  $200 \times 200$  km and grid size of  $35 \times 35$ . Daily data for December, January, and February over ten year 2005 – 2014 were used.

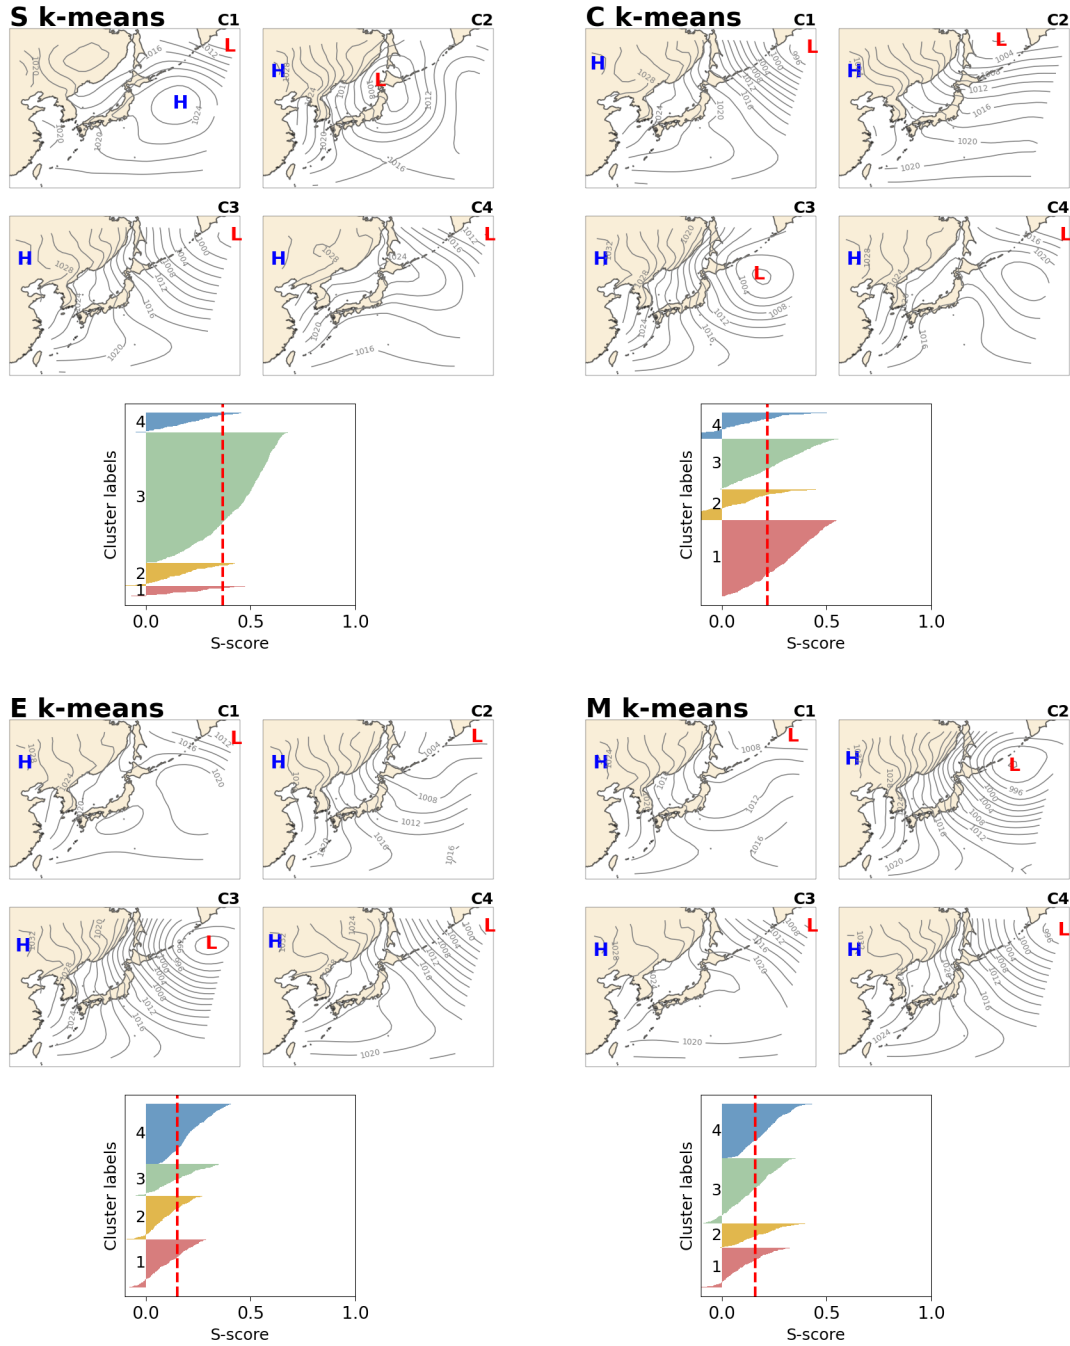

**Fig. S5** Similar with Figure 3 in the main manuscript but for the results from run 5. The winter SLP pattern revealed by S, C, E, and M k-means with  $k = 4$ . "H" indicates the location of the high and "L" indicates the location of the low. General silhouette analysis results are shown below the maps where x-axis indicate the score, and y-axis the label of cluster numbered 1 – 4. Input data are ERA-Interim SLP data, which were re-gridded to Cartesian coordinates with a resolution of  $200 \times 200$  km and grid size of  $35 \times 35$ . Daily data for December, January, and February over ten year 2005 – 2014 were used.

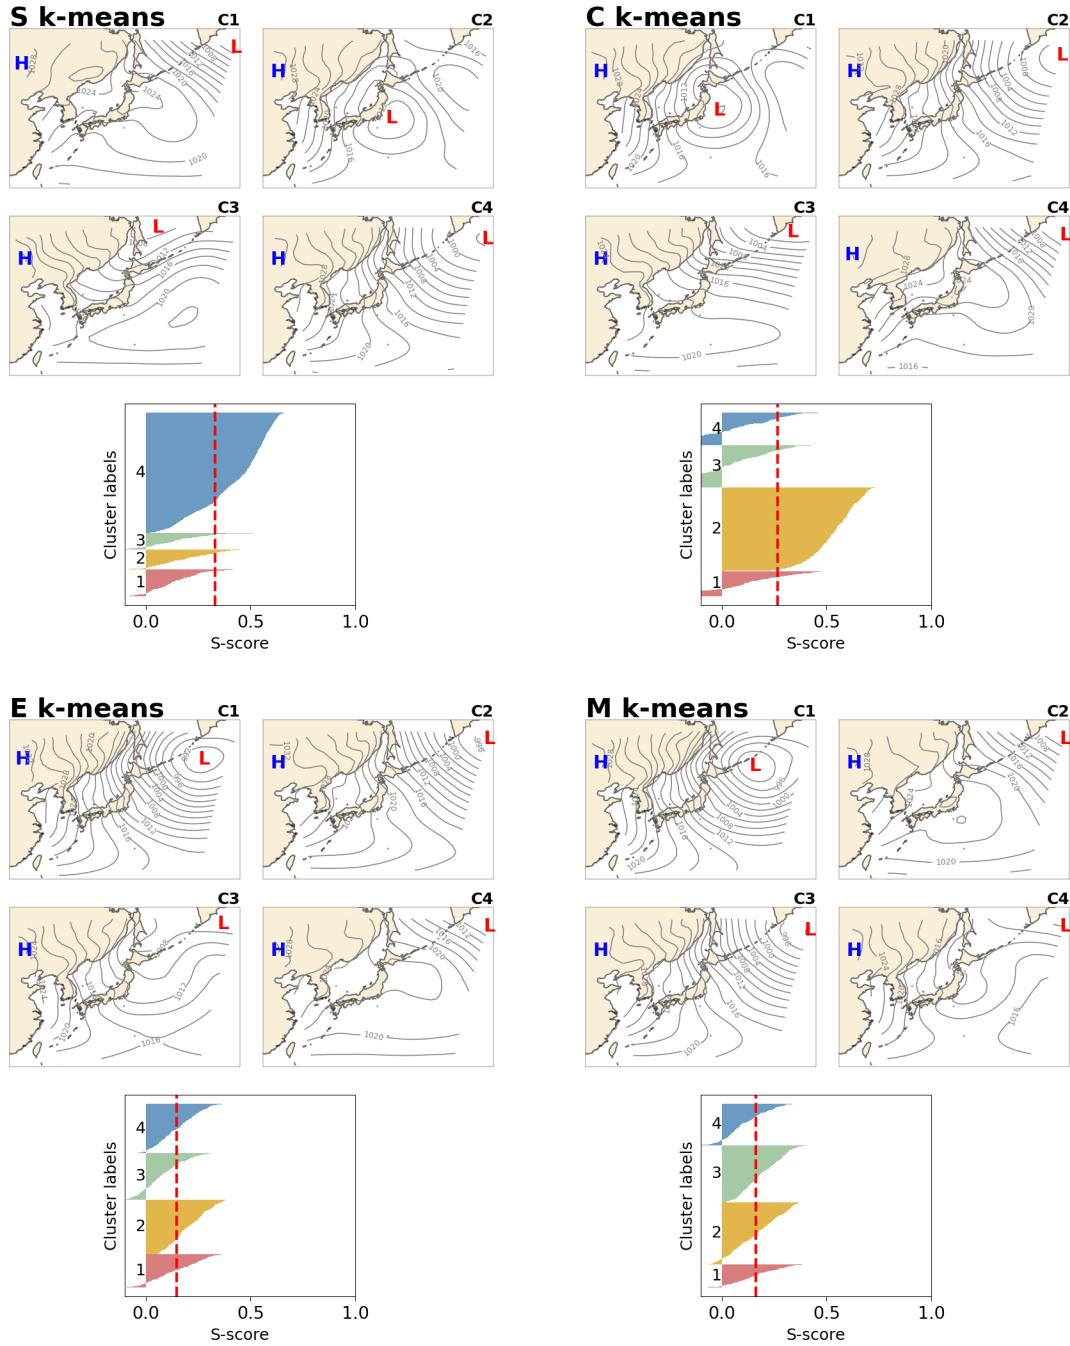

**Fig. S6** Similar with Figure 3 in the main manuscript but for the results from run 6. The winter SLP pattern revealed by S, C, E, and M k-means with  $k = 4$ . "H" indicates the location of the high and "L" indicates the location of the low. General silhouette analysis results are shown below the maps where x-axis indicate the score, and y-axis the label of cluster numbered 1 – 4. Input data are ERA-Interim SLP data, which were re-gridded to Cartesian coordinates with a resolution of  $200 \times 200$  km and grid size of  $35 \times 35$ . Daily data for December, January, and February over ten year 2005 – 2014 were used.

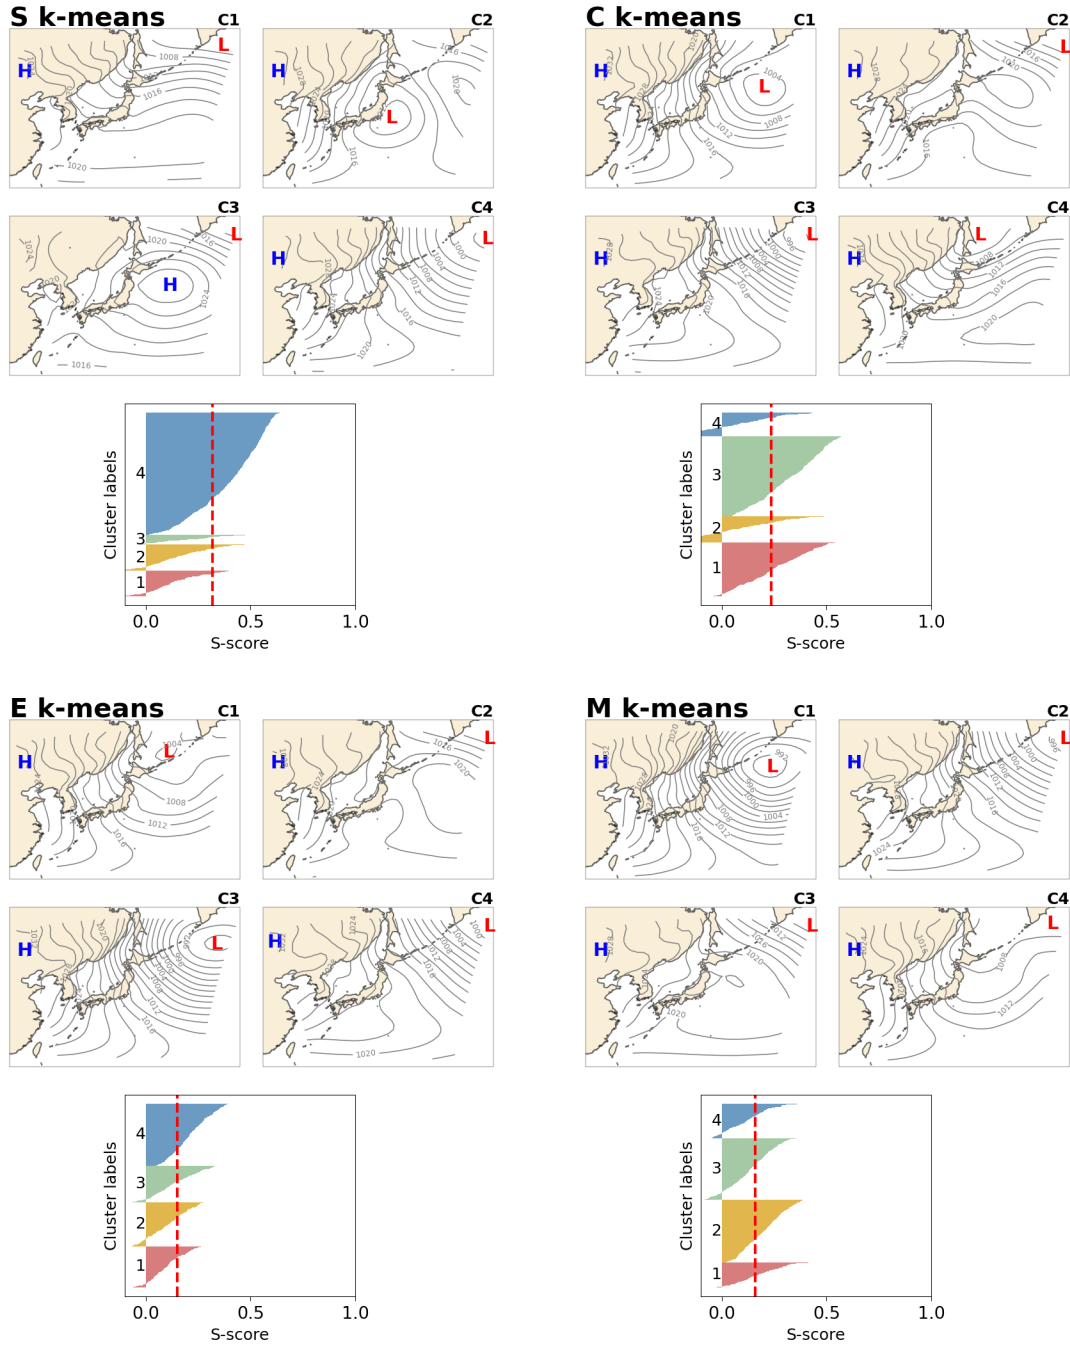

**Fig. S7** Similar with Figure 3 in the main manuscript but for the results from run 7. The winter SLP pattern revealed by S, C, E, and M k-means with  $k = 4$ . "H" indicates the location of the high and "L" indicates the location of the low. General silhouette analysis results are shown below the maps where x-axis indicate the score, and y-axis the label of cluster numbered 1 – 4. Input data are ERA-Interim SLP data, which were re-gridded to Cartesian coordinates with a resolution of  $200 \times 200$  km and grid size of  $35 \times 35$ . Daily data for December, January, and February over ten year 2005 – 2014 were used.

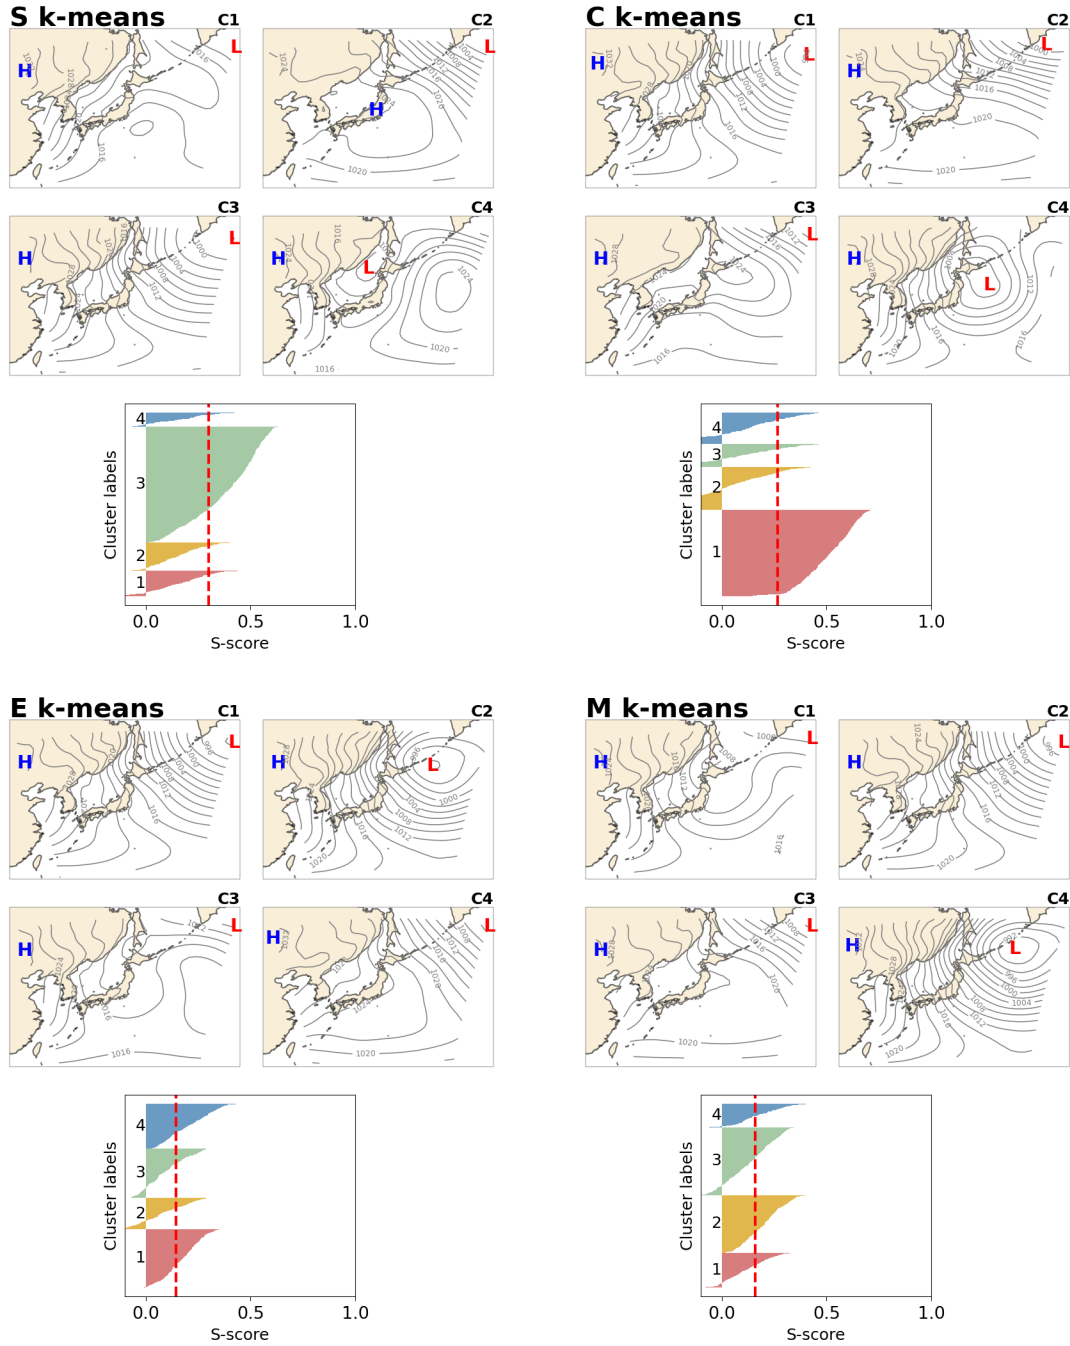

**Fig. S8** Similar with Figure 3 in the main manuscript but for the results from run 8. The winter SLP pattern revealed by S, C, E, and M k-means with  $k = 4$ . "H" indicates the location of the high and "L" indicates the location of the low. General silhouette analysis results are shown below the maps where x-axis indicate the score, and y-axis the label of cluster numbered 1 – 4. Input data are ERA-Interim SLP data, which were re-gridded to Cartesian coordinates with a resolution of  $200 \times 200$  km and grid size of  $35 \times 35$ . Daily data for December, January, and February over ten year 2005 – 2014 were used.

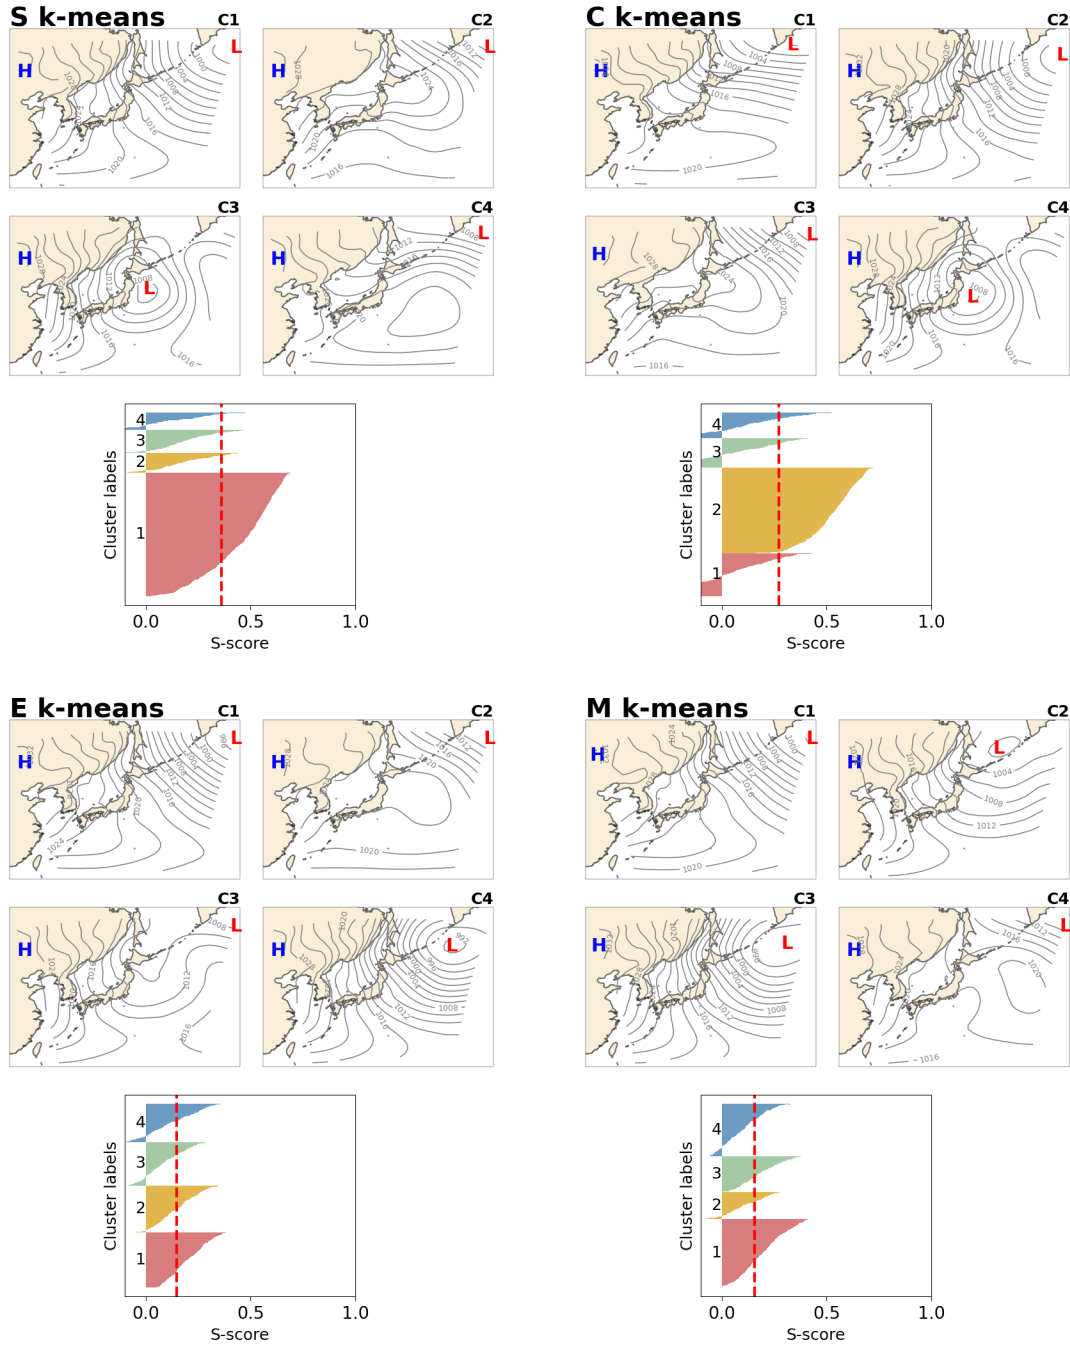

**Fig. S9** Similar with Figure 3 in the main manuscript but for the results from run 9. The winter SLP pattern revealed by S, C, E, and M k-means with  $k = 4$ . "H" indicates the location of the high and "L" indicates the location of the low. General silhouette analysis results are shown below the maps where x-axis indicate the score, and y-axis the label of cluster numbered 1 – 4. Input data are ERA-Interim SLP data, which were re-gridded to Cartesian coordinates with a resolution of  $200 \times 200$  km and grid size of  $35 \times 35$ . Daily data for December, January, and February over ten year 2005 – 2014 were used.

## Results for the CC test

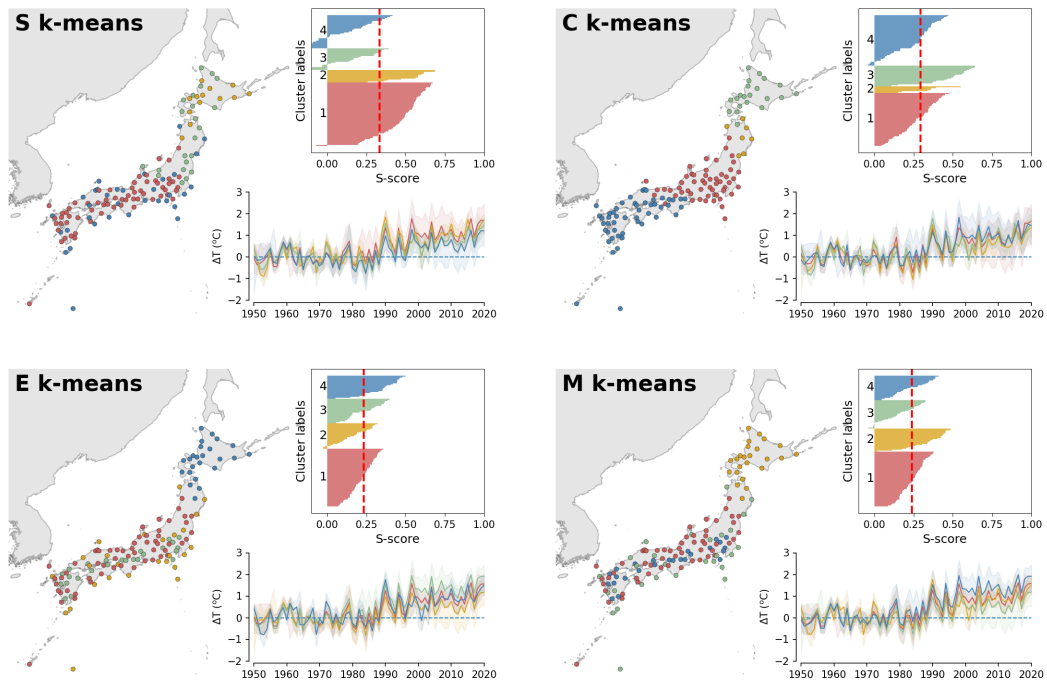

**Fig. S10** Similar with Figure 4 in the main manuscript but for the results from run 1. Result for CC experiment for cluster the climate change (temperature increase) time series over 134 weather stations over the entirety of Japan. Pattern were revealed by S, C, E, and M k-means with  $k = 4$ . Input data correspond to annual mean data collected over 70 years from 1951 – 2020 (subtracted by the mean of the first 30 years) and observed temperature achieved at in situ weather stations (dots in map) operated by the JMA. Time series of centroids and input vectors are shown in below panels together with general silhouette analysis results, where the x-axis indicates the score (S-score) and the y-axis presents the labels of clusters numbered 1 – 4.



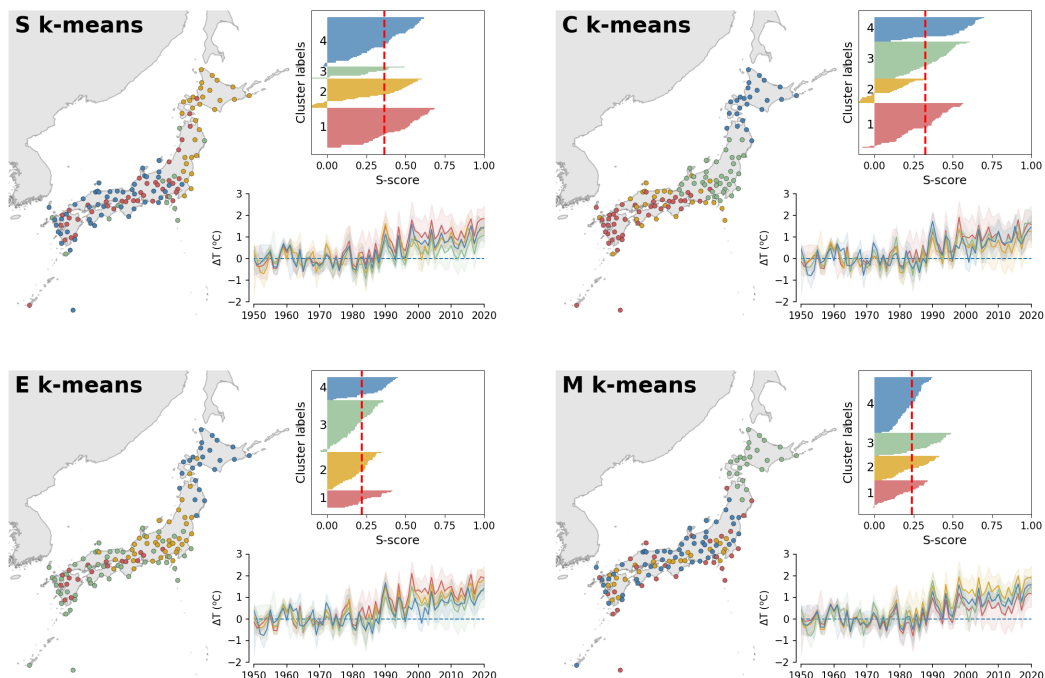

**Fig. S11** Similar with Figure 4 in the main manuscript but for the results from run 2. Result for CC experiment for cluster the climate change (temperature increase) time series over 134 weather stations over the entirety of Japan. Pattern were revealed by S, C, E, and M k-means with  $k = 4$ . Input data correspond to annual mean data collected over 70 years from 1951 – 2020 (subtracted by the mean of the first 30 years) and observed temperature achieved at in situ weather stations (dots in map) operated by the JMA. Time series of centroids and input vectors are shown in below panels together with general silhouette analysis results, where the x-axis indicates the score (S-score) and the y-axis presents the labels of clusters numbered 1 – 4.

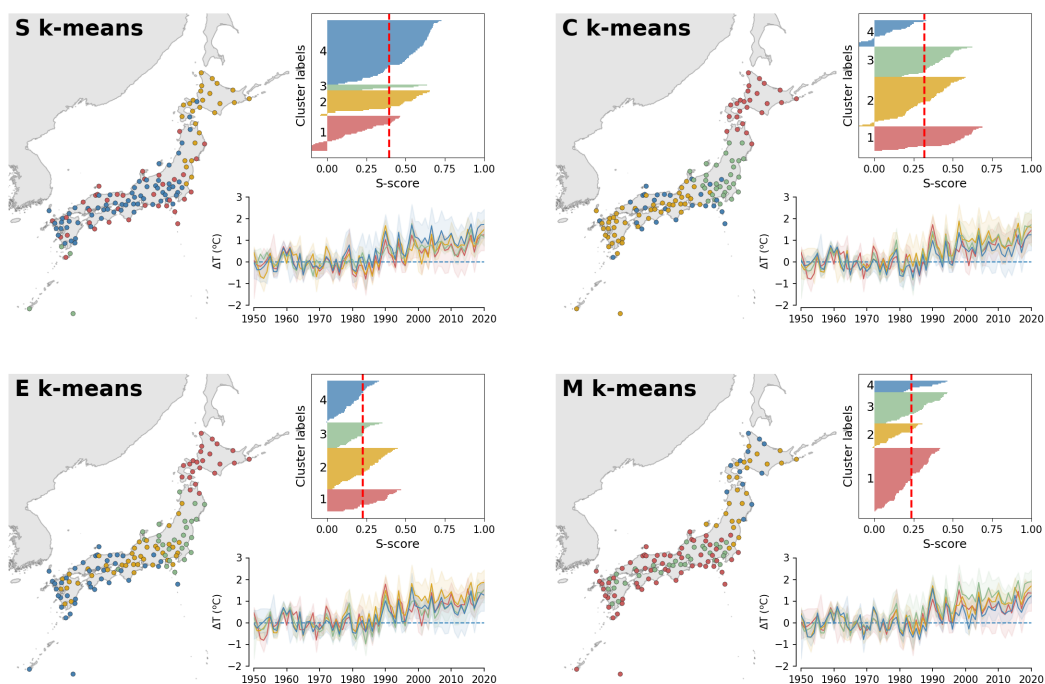



**Fig. S12** Similar with Figure 4 in the main manuscript but for the results from run 3. Result for CC experiment for cluster the climate change (temperature increase) time series over 134 weather stations over the entirety of Japan. Pattern were revealed by S, C, E, and M k-means with  $k = 4$ . Input data correspond to annual mean data collected over 70 years from 1951 – 2020 (subtracted by the mean of the first 30 years) and observed temperature achieved at in situ weather stations (dots in map) operated by the JMA. Time series of centroids and input vectors are shown in below panels together with general silhouette analysis results, where the x-axis indicates the score (S-score) and the y-axis presents the labels of clusters numbered 1 – 4.

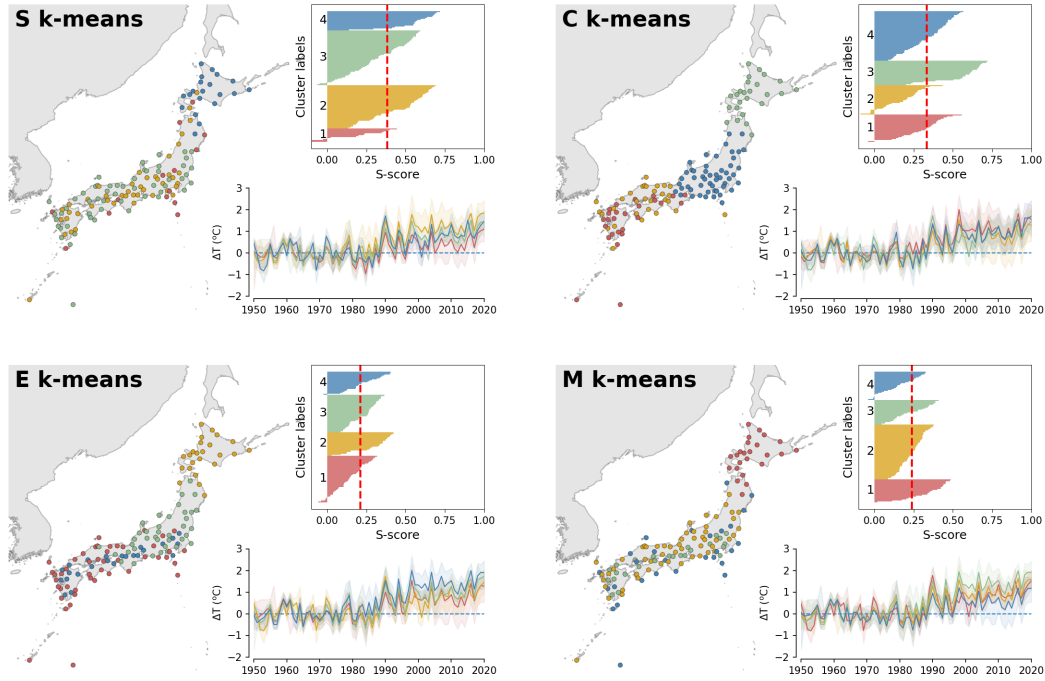

**Fig. S13** Similar with Figure 4 in the main manuscript but for the results from run 4. Result for CC experiment for cluster the climate change (temperature increase) time series over 134 weather stations over the entirety of Japan. Pattern were revealed by S, C, E, and M k-means with  $k = 4$ . Input data correspond to annual mean data collected over 70 years from 1951 – 2020 (subtracted by the mean of the first 30 years) and observed temperature achieved at in situ weather stations (dots in map) operated by the JMA. Time series of centroids and input vectors are shown in below panels together with general silhouette analysis results, where the x-axis indicates the score (S-score) and the y-axis presents the labels of clusters numbered 1 – 4.

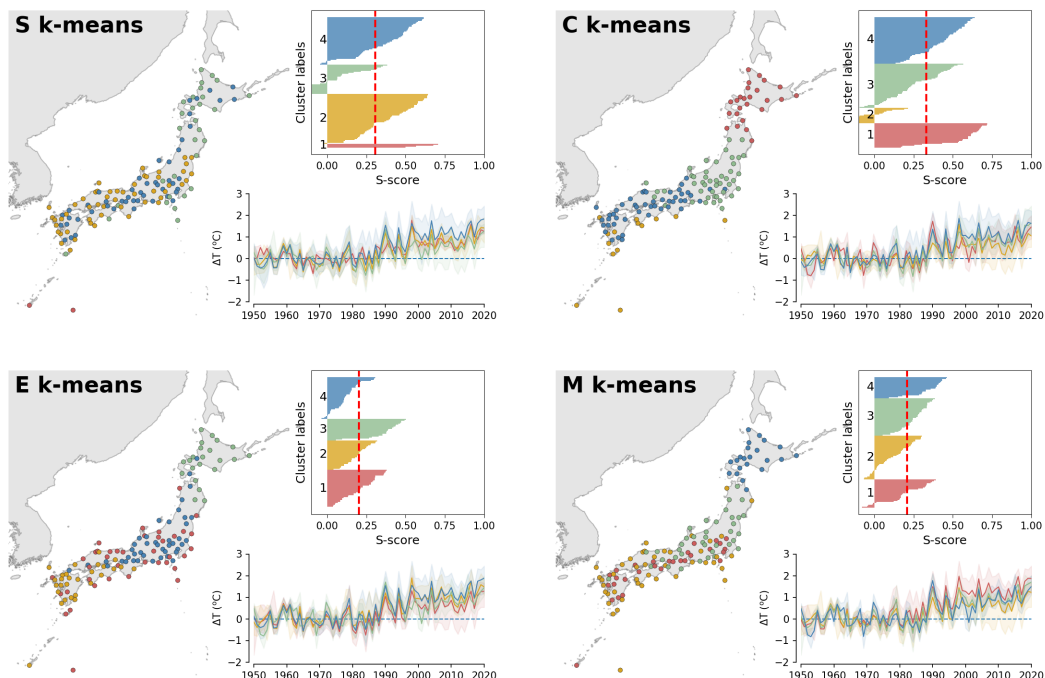

**Fig. S14** Similar with Figure 4 in the main manuscript but for the results from run 5. Result for CC experiment for cluster the climate change (temperature increase) time series over 134 weather stations over the entirety of Japan. Pattern were revealed by S, C, E, and M k-means with  $k = 4$ . Input data correspond to annual mean data collected over 70 years from 1951 – 2020 (subtracted by the mean of the first 30 years) and observed temperature achieved at in situ weather stations (dots in map) operated by the JMA. Time series of centroids and input vectors are shown in below panels together with general silhouette analysis results, where the x-axis indicates the score (S-score) and the y-axis presents the labels of clusters numbered 1 – 4.

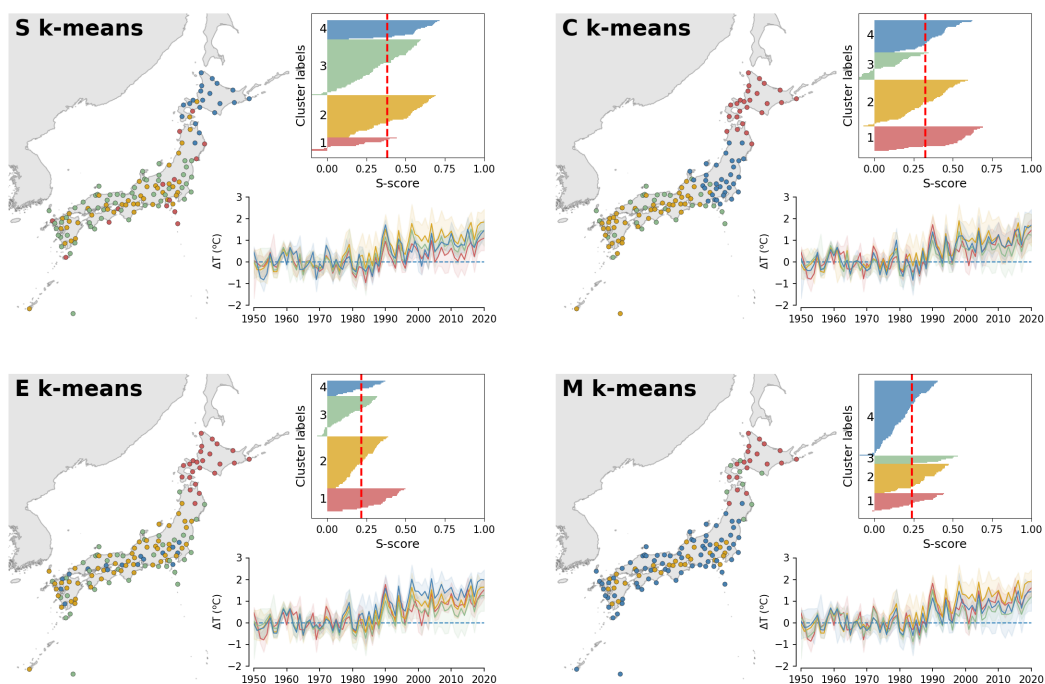

**Fig. S15** Similar with Figure 4 in the main manuscript but for the results from run 6. Result for CC experiment for cluster the climate change (temperature increase) time series over 134 weather stations over the entirety of Japan. Pattern were revealed by S, C, E, and M k-means with  $k = 4$ . Input data correspond to annual mean data collected over 70 years from 1951 – 2020 (subtracted by the mean of the first 30 years) and observed temperature achieved at in situ weather stations (dots in map) operated by the JMA. Time series of centroids and input vectors are shown in below panels together with general silhouette analysis results, where the x-axis indicates the score (S-score) and the y-axis presents the labels of clusters numbered 1 – 4.

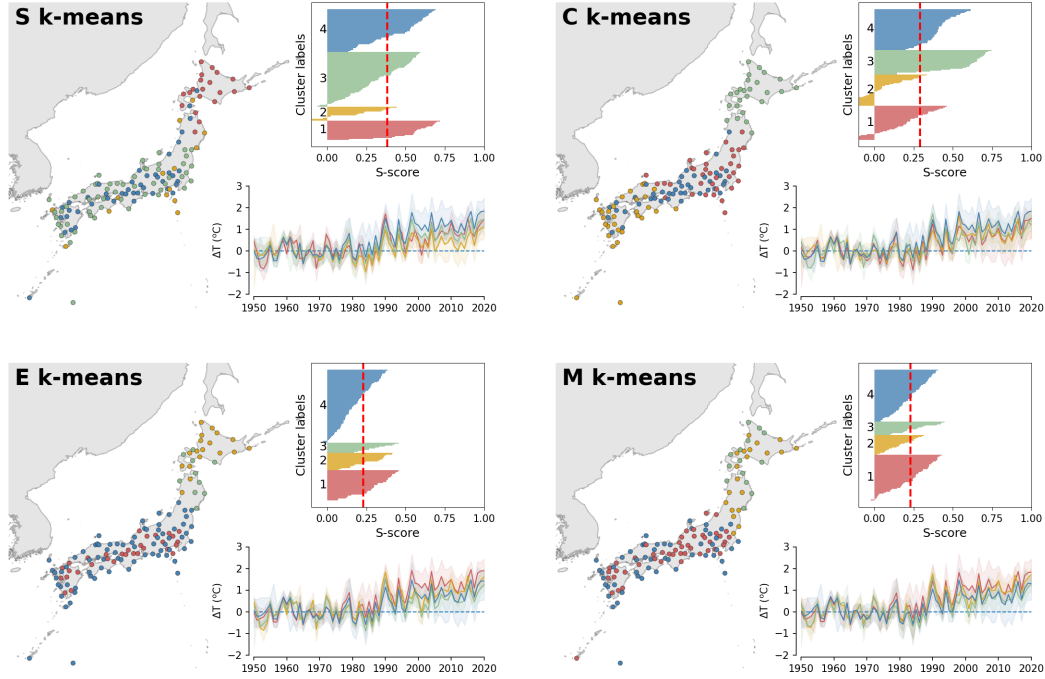

**Fig. S16** Similar with Figure 4 in the main manuscript but for the results from run 7. Result for CC experiment for cluster the climate change (temperature increase) time series over 134 weather stations over the entirety of Japan. Pattern were revealed by S, C, E, and M k-means with  $k = 4$ . Input data correspond to annual mean data collected over 70 years from 1951 – 2020 (subtracted by the mean of the first 30 years) and observed temperature achieved at in situ weather stations (dots in map) operated by the JMA. Time series of centroids and input vectors are shown in below panels together with general silhouette analysis results, where the x-axis indicates the score (S-score) and the y-axis presents the labels of clusters numbered 1 – 4.

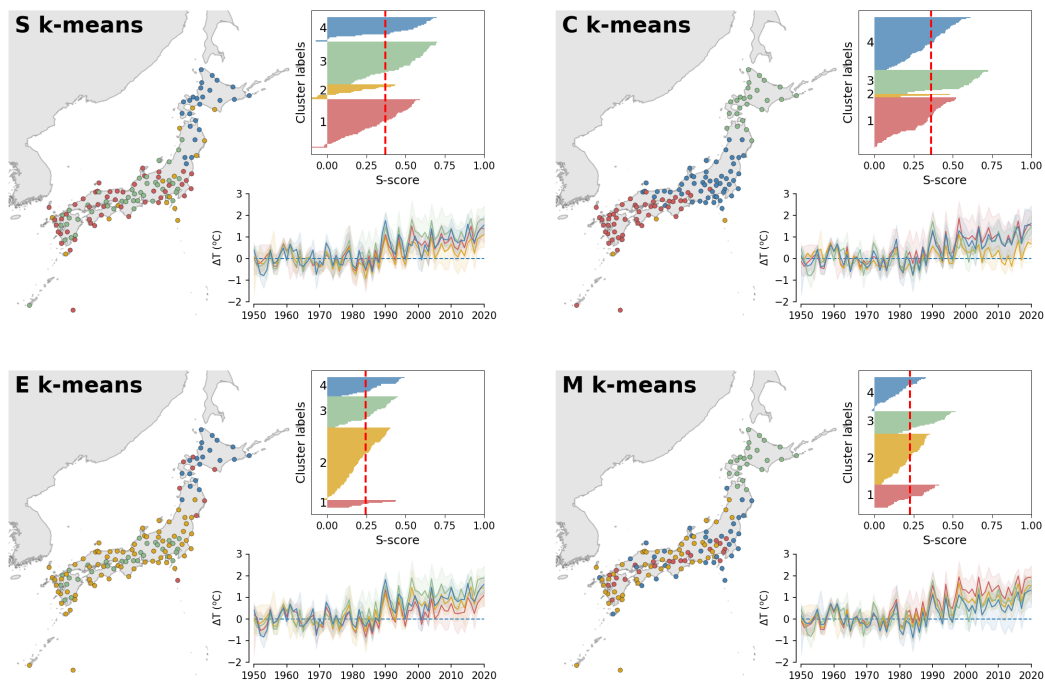

**Fig. S17** Similar with Figure 4 in the main manuscript but for the results from run 8. Result for CC experiment for cluster the climate change (temperature increase) time series over 134 weather stations over the entirety of Japan. Pattern were revealed by S, C, E, and M k-means with  $k = 4$ . Input data correspond to annual mean data collected over 70 years from 1951 – 2020 (subtracted by the mean of the first 30 years) and observed temperature achieved at in situ weather stations (dots in map) operated by the JMA. Time series of centroids and input vectors are shown in below panels together with general silhouette analysis results, where the x-axis indicates the score (S-score) and the y-axis presents the labels of clusters numbered 1 – 4.

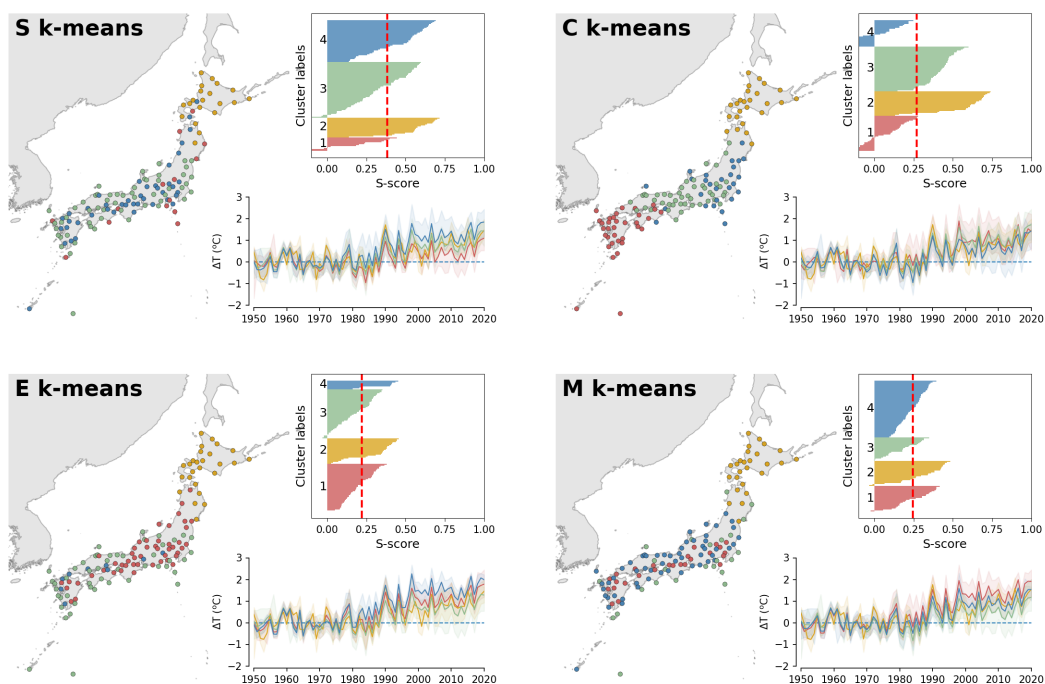

**Fig. S18** Similar with Figure 4 in the main manuscript but for the results from run 9. Result for CC experiment for cluster the climate change (temperature increase) time series over 134 weather stations over the entirety of Japan. Pattern were revealed by S, C, E, and M k-means with  $k = 4$ . Input data correspond to annual mean data collected over 70 years from 1951 – 2020 (subtracted by the mean of the first 30 years) and observed temperature achieved at in situ weather stations (dots in map) operated by the JMA. Time series of centroids and input vectors are shown in below panels together with general silhouette analysis results, where the x-axis indicates the score (S-score) and the y-axis presents the labels of clusters numbered 1 – 4.

## Results for the TC test

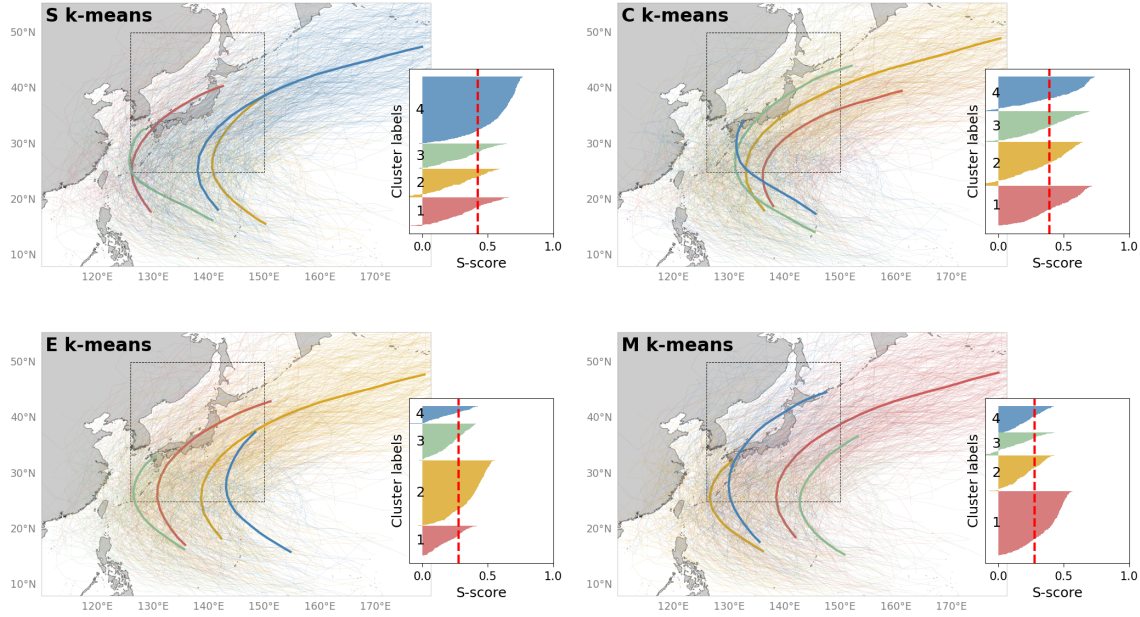

**Fig. S19** Similar with Figure 5 in the maintext but for run 1. Results of the TC experiment for clustering tropical cyclone paths. The pattern was revealed by S, C, E, and M k-means, with  $k = 4$ . Input data are the best TC tracks obtained by the JMA from 1951 – 2020. Only TCs that passed the dashed box in the map are used to feed the k-means. Thus, a total of 863 TC tracking data points are used. The left side of each panel show the general silhouette analysis results, where the x-axis indicates the score (S-score) and y-axis presents the labels of clusters numbered 1 – 4. The centroid TC path is illustrated by the bold line, and the color is consistent with that in the silhouette diagram.



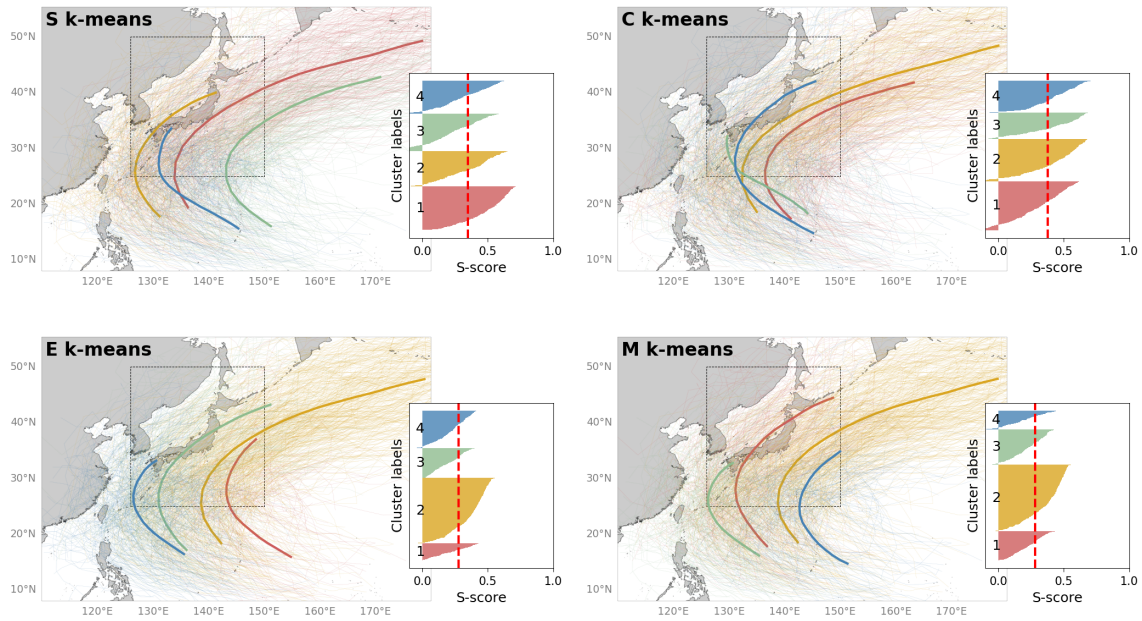

**Fig. S20** Similar with Figure 5 in the maintext but for run 2. Results of the TC experiment for clustering tropical cyclone paths. The pattern was revealed by S, C, E, and M k-means, with  $k = 4$ . Input data are the best TC tracks obtained by the JMA from 1951 – 2020. Only TCs that passed the dashed box in the map are used to feed the k-means. Thus, a total of 863 TC tracking data points are used. The left side of each panel show the general silhouette analysis results, where the x-axis indicates the score (S-score) and y-axis presents the labels of clusters numbered 1 – 4. The centroid TC path is illustrated by the bold line, and the color is consistent with that in the silhouette diagram.

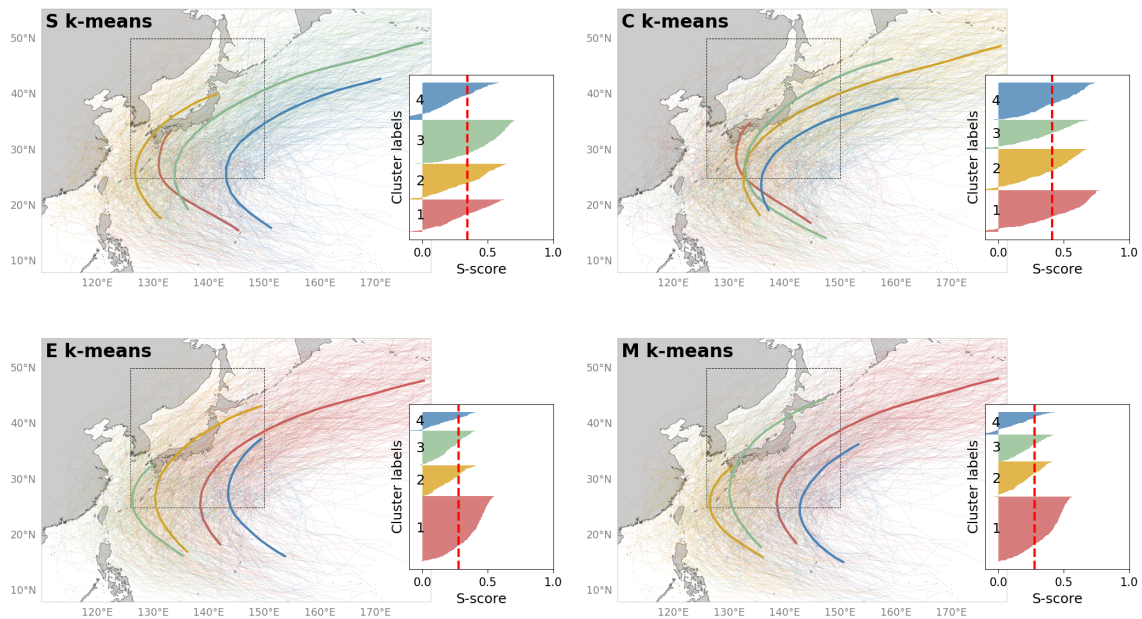

**Fig. S21** Similar with Figure 5 in the maintext but for run 3. Results of the TC experiment for clustering tropical cyclone paths. The pattern was revealed by S, C, E, and M k-means, with  $k = 4$ . Input data are the best TC tracks obtained by the JMA from 1951 – 2020. Only TCs that passed the dashed box in the map are used to feed the k-means. Thus, a total of 863 TC tracking data points are used. The left side of each

panel show the general silhouette analysis results, where the x-axis indicates the score (S-score) and y-axis presents the labels of clusters numbered 1 – 4. The centroid TC path is illustrated by the bold line, and the color is consistent with that in the silhouette diagram.

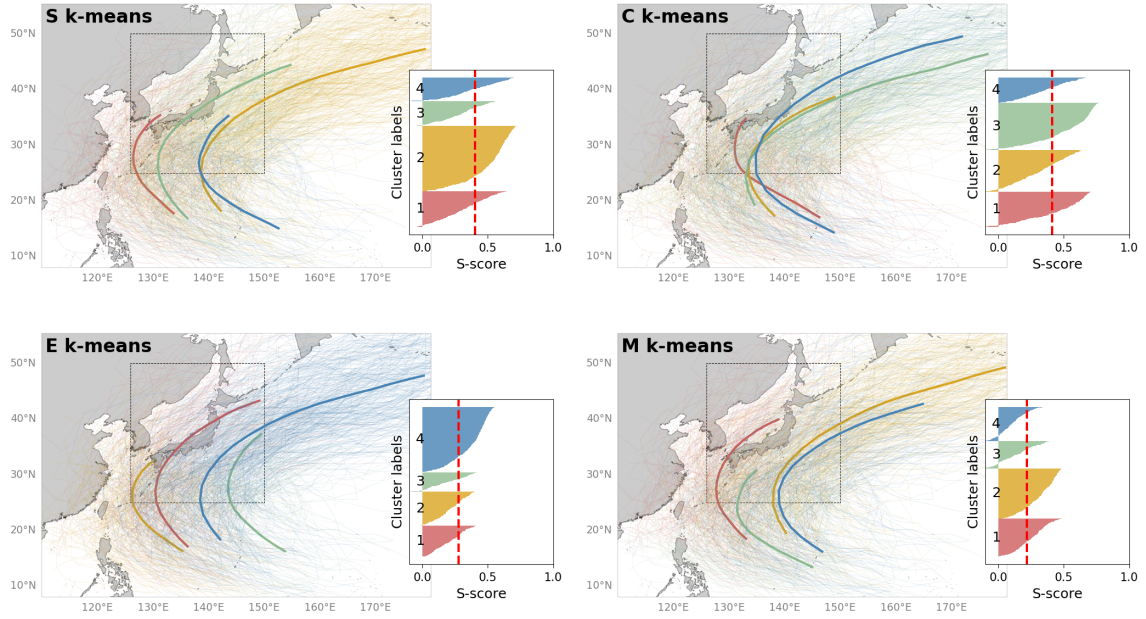

**Fig. S22** Similar with Figure 5 in the maintext but for run 4. Results of the TC experiment for clustering tropical cyclone paths. The pattern was revealed by S, C, E, and M k-means, with  $k = 4$ . Input data are the best TC tracks obtained by the JMA from 1951 – 2020. Only TCs that passed the dashed box in the map are used to feed the k-means. Thus, a total of 863 TC tracking data points are used. The left side of each panel show the general silhouette analysis results, where the x-axis indicates the score (S-score) and y-axis presents the labels of clusters numbered 1 – 4. The centroid TC path is illustrated by the bold line, and the color is consistent with that in the silhouette diagram.

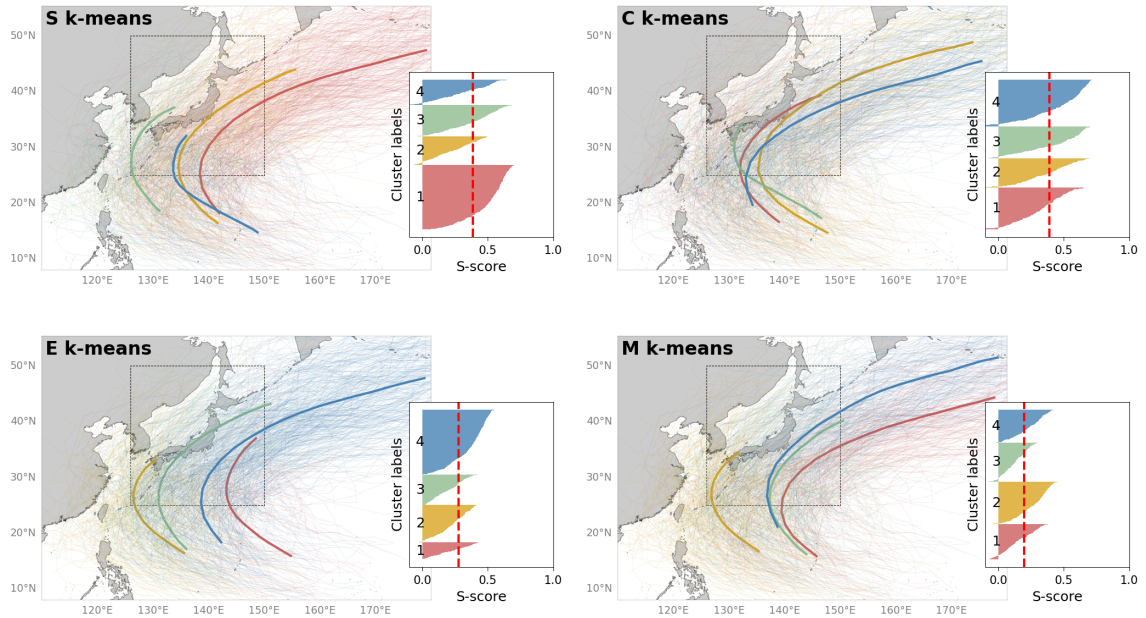

**Fig. S23** Similar with Figure 5 in the maintext but for run 5. Results of the TC experiment for clustering tropical cyclone paths. The pattern was revealed by S, C, E, and M k-means, with  $k = 4$ . Input data are the best TC tracks obtained by the JMA from 1951 – 2020. Only TCs that passed the dashed box in the map are used to feed the k-means. Thus, a total of 863 TC tracking data points are used. The left side of each panel show the general silhouette analysis results, where the x-axis indicates the score (S-score) and y-axis presents the labels of clusters numbered 1 – 4. The centroid TC path is illustrated by the bold line, and the color is consistent with that in the silhouette diagram.

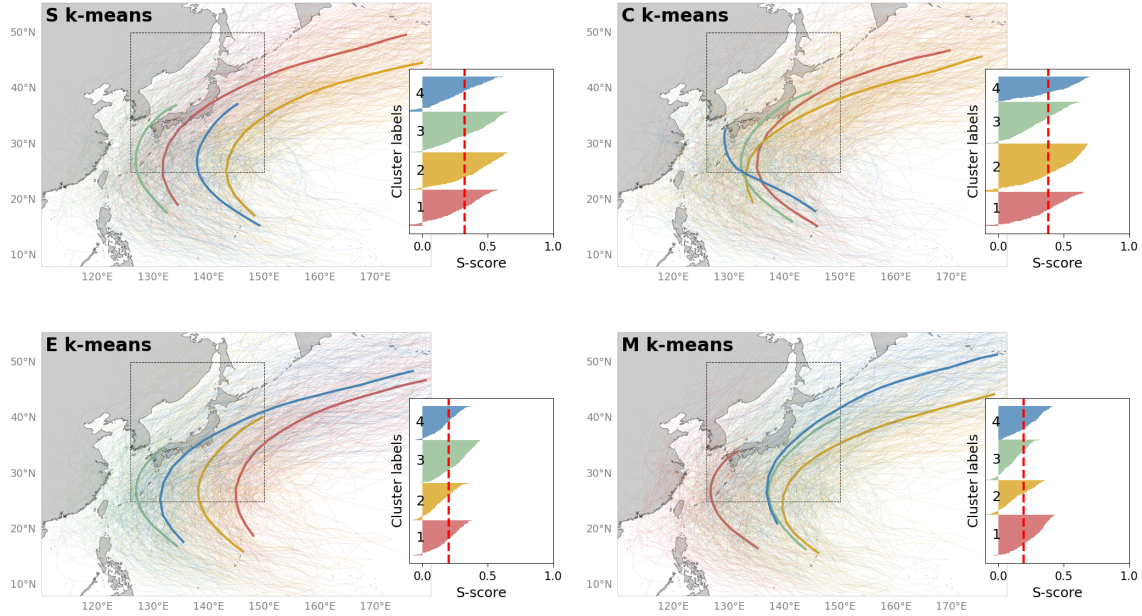

**Fig. S24** Similar with Figure 5 in the maintext but for run 6. Results of the TC experiment for clustering tropical cyclone paths. The pattern was revealed by S, C, E, and M k-means, with  $k = 4$ . Input data are the best TC tracks obtained by the JMA from 1951 – 2020. Only TCs that passed the dashed box in the map are used to feed the k-means. Thus, a total of 863 TC tracking data points are used. The left side of each panel show the general silhouette analysis results, where the x-axis indicates the score (S-score) and y-axis presents the labels of clusters numbered 1 – 4. The centroid TC path is illustrated by the bold line, and the color is consistent with that in the silhouette diagram.



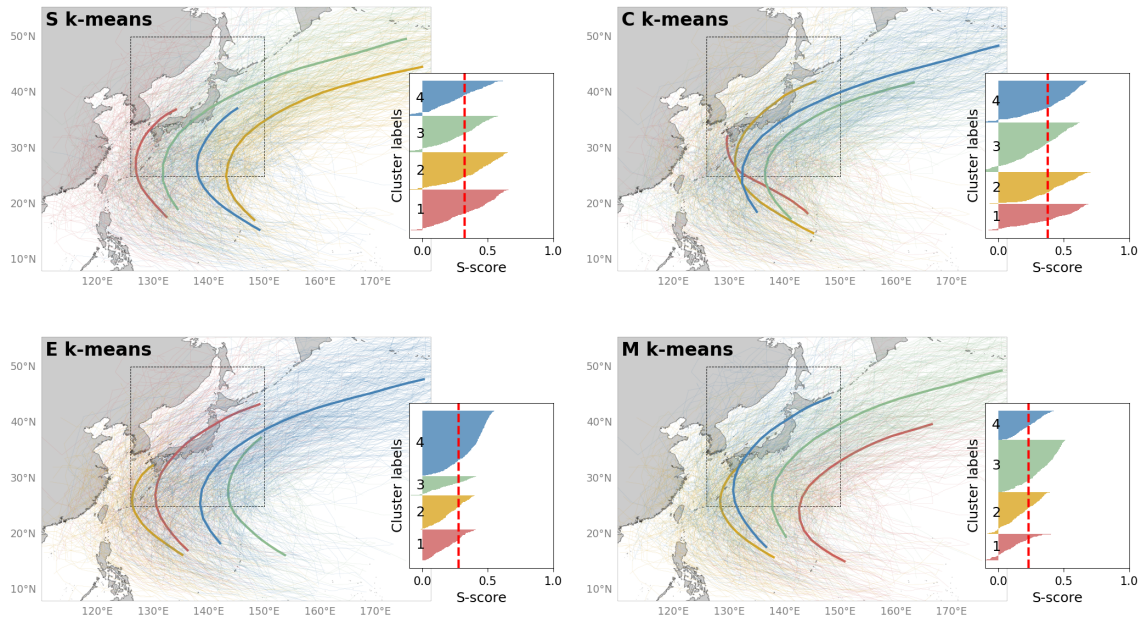

**Fig. S25** Similar with Figure 5 in the maintext but for run 7. Results of the TC experiment for clustering tropical cyclone paths. The pattern was revealed by S, C, E, and M k-means, with  $k = 4$ . Input data are the best TC tracks obtained by the JMA from 1951 – 2020. Only TCs that passed the dashed box in the map are used to feed the k-means. Thus, a total of 863 TC tracking data points are used. The left side of each panel show the general silhouette analysis results, where the x-axis indicates the score (S-score) and y-axis presents the labels of clusters numbered 1 – 4. The centroid TC path is illustrated by the bold line, and the color is consistent with that in the silhouette diagram.

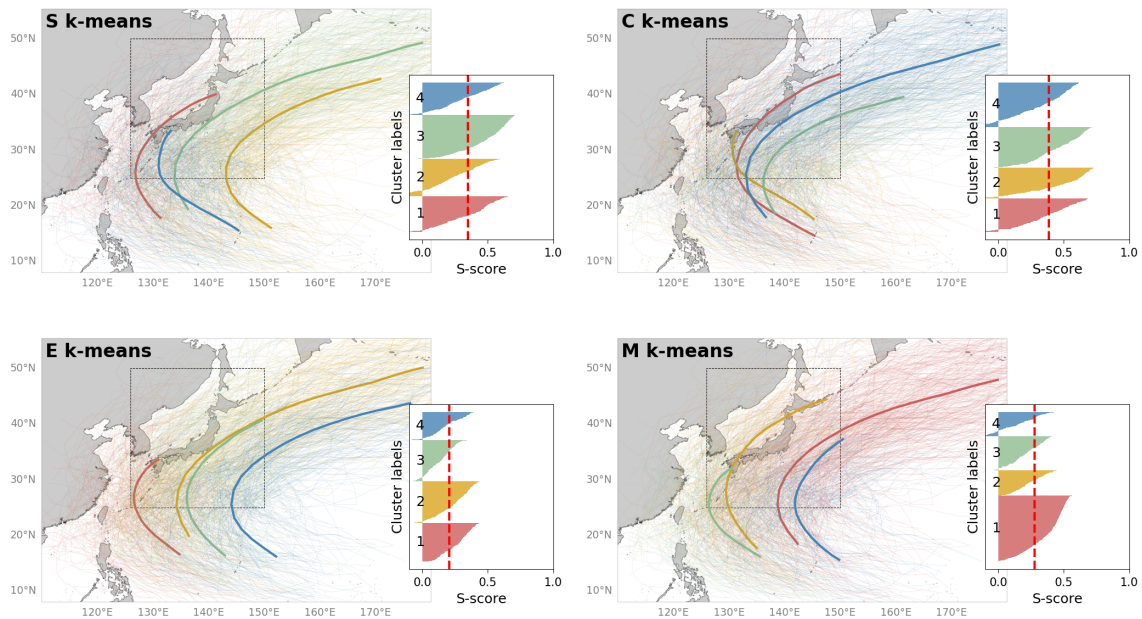

**Fig. S26** Similar with Figure 5 in the maintext but for run 8. Results of the TC experiment for clustering tropical cyclone paths. The pattern was revealed by S, C, E, and M k-means, with  $k = 4$ . Input data are the best TC tracks obtained by the JMA from 1951 – 2020. Only TCs that passed the dashed box in the map are used to feed the k-means. Thus, a total of 863 TC tracking data points are used. The left side of each

panel show the general silhouette analysis results, where the x-axis indicates the score (S-score) and y-axis presents the labels of clusters numbered 1 – 4. The centroid TC path is illustrated by the bold line, and the color is consistent with that in the silhouette diagram.

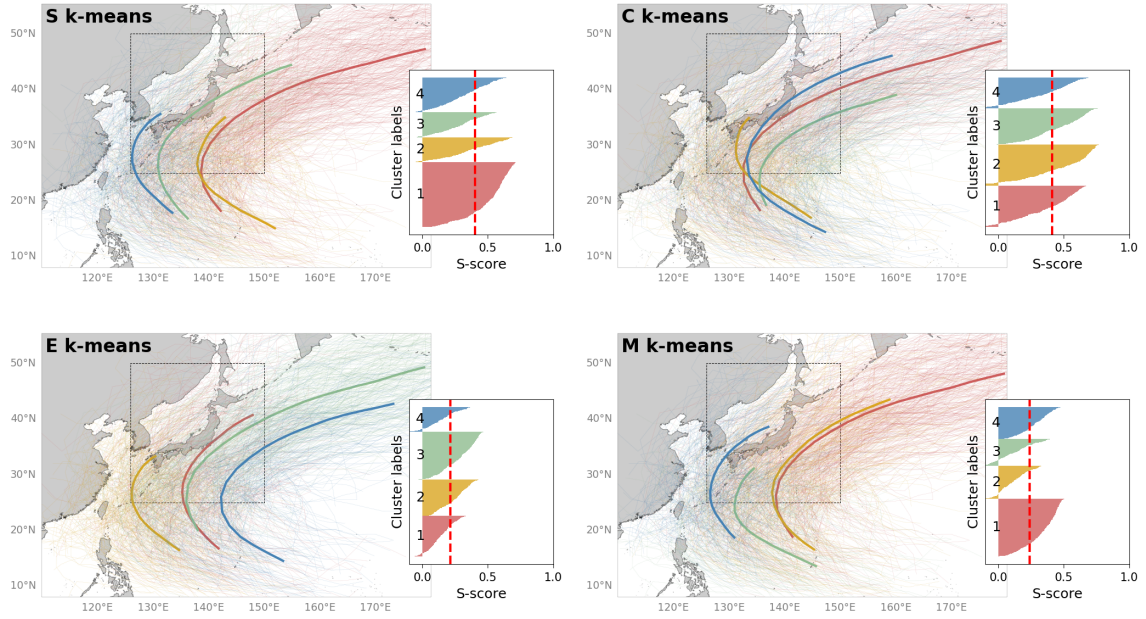

**Fig. S27** Similar with Figure 5 in the maintext but for run 9. Results of the TC experiment for clustering tropical cyclone paths. The pattern was revealed by S, C, E, and M k-means, with  $k = 4$ . Input data are the best TC tracks obtained by the JMA from 1951 – 2020. Only TCs that passed the dashed box in the map are used to feed the k-means. Thus, a total of 863 TC tracking data points are used. The left side of each panel show the general silhouette analysis results, where the x-axis indicates the score (S-score) and y-axis presents the labels of clusters numbered 1 – 4. The centroid TC path is illustrated by the bold line, and the color is consistent with that in the silhouette diagram.

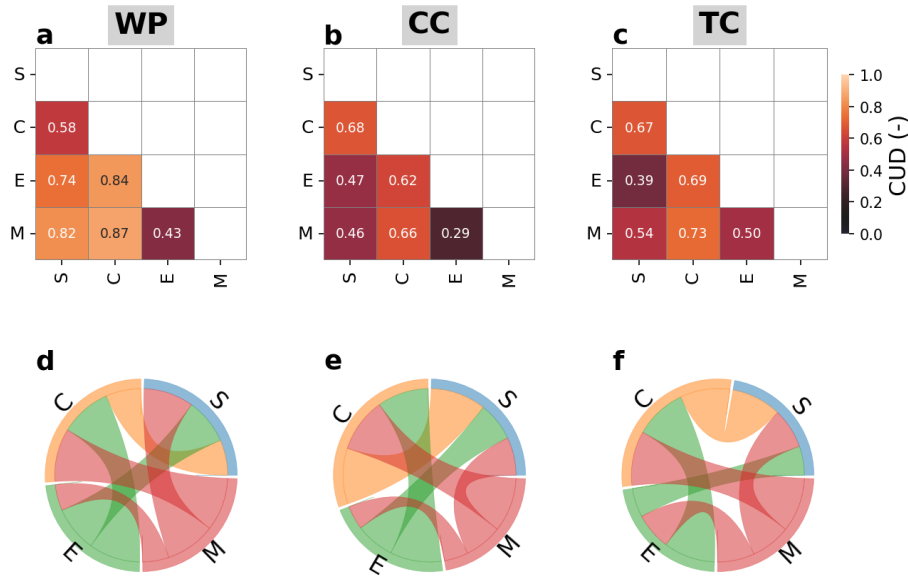

**Fig. S28** Clustering uncertainty degree (CUD) based on adjusted mutual information (AMI) between clustering results from different k-means algorithms, i.e., S, C, E, and M k-means, for different experiments: WP, CC, and TC. (a, b, c) CUD in heatmaps, and (d, e, f) visualization of the interconnection using the chord diagrams. Note that the results are from the configuration with  $k=4$  and the four k-means variants use the same starting centroids.

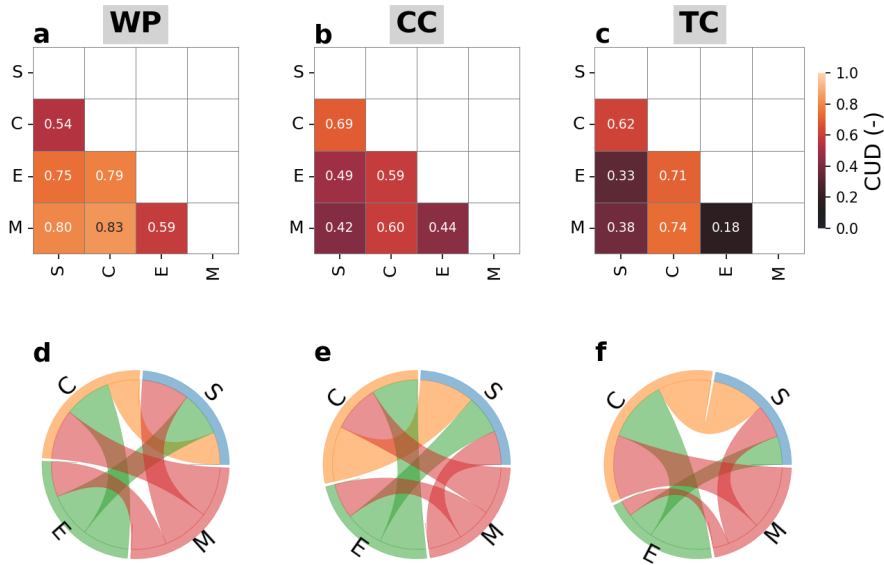

**Fig. S29** Clustering uncertainty degree (CUD) based on adjusted mutual information (AMI) between clustering results from different k-means algorithms, i.e., S, C, E, and M k-means++, for different demo experiments: WP, CC, and TC. (a, b, c) CUD in heatmaps, and (d, e, f) visualization of the interconnection using the chord diagrams. Note that the results are from the configuration with  $k=4$  and the first initialization run.

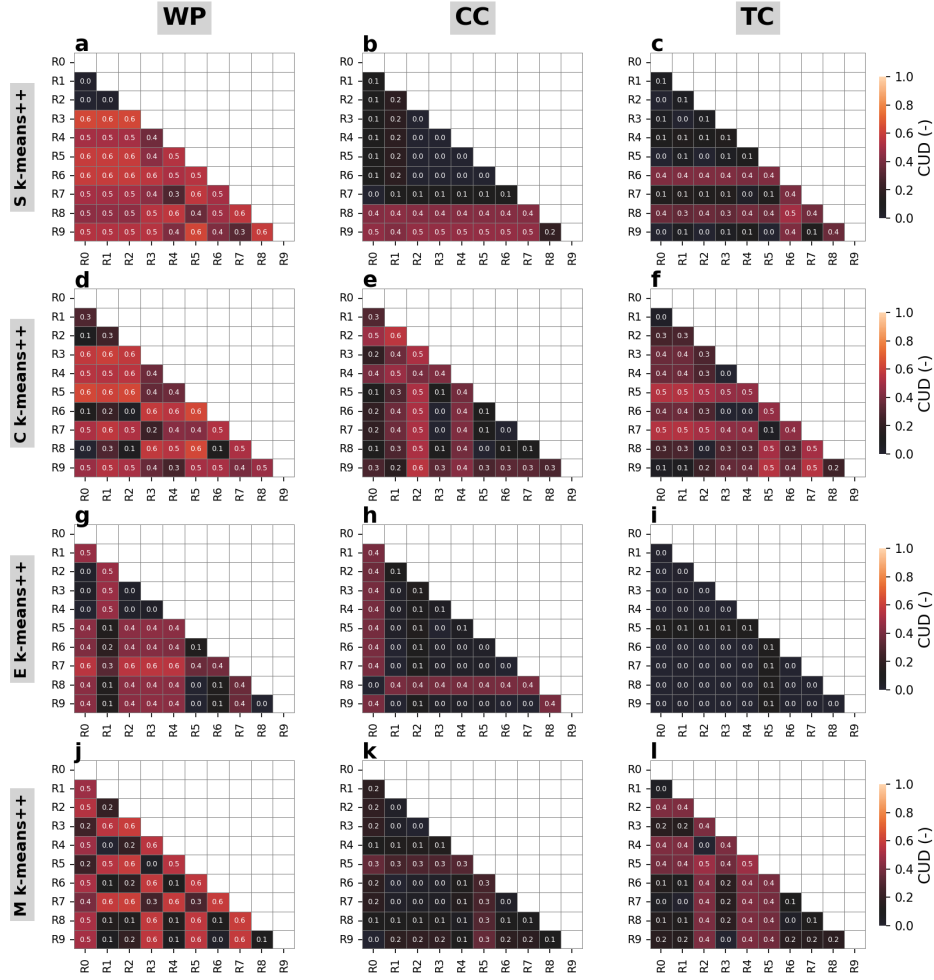

**Fig. S30** Clustering uncertainty degree (CUD) based on adjusted mutual information (AMI) between the clustering results from different runs (10 runs indicated by R0, R1, ..., R9) of different  $k$ -means++ algorithms, i.e., S, C, E, and M  $k$ -means++ (rows), for different demo experiments: WP, CC, and TC (columns). Note that the results are from the configuration with  $k=4$  and the first initialization run.
