# Supplementary material for: Structural k -means (S k -means) and clustering uncertainty evaluation framework (CUEF) for mining climate data
Source: Copernicus journal article supplement (doi:10.5194/gmd-16-2215-2023), 2023-04-24
Supplement: Supplementary file [file gmd-16-2215-2023-supplement-title-page.pdf › gmd-16-2215-2023-supplement-title-page.pdf]

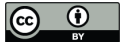

*Supplement of*

## **Structural $k$ -means (S $k$ -means) and clustering uncertainty evaluation framework (CUEF) for mining climate data**

**Quang-Van Doan et al.**

*Correspondence to:* Quang-Van Doan ([doan.van.gb@u.tsukuba.ac.jp](mailto:doan.van.gb@u.tsukuba.ac.jp))

- [gmd-16-2215-2023-supplement-title-page.pdf](#)
- Supmat
  - [Readme Github S k-means .pdf](#)
  - [SupplementaryInfo\\_fin.pdf](#)

The copyright of individual parts of the supplement might differ from the article licence.
